# Supplementary material for: Spectroscopic and electron paramagnetic resonance behavior of trinuclear metallic clusters encapsulated in [Mn+3(H2O)x(BiW9O33)2](18–3n)– heteropolyanion (Mn+ = (VO)II, x = 0 and Mn+ = CrIII, MnII, FeIII, CoII, NiII, CuII, x = 3)†
Source: Royal Society of Chemistry journal article supplement (doi:10.1039/b104848c), 2001-01-01
Supplement: b104848c.doc [file b104848c.doc]

Supplementary Material

***Table 1*** *Some FT-IR bands (cm1) of the ligand and sandwich-type complexes* ***1****-****7***

| Sample | asym(OH) | (OH) | asym(W=Ot) | asym(WOeW) | asym(WOcW) | asym(WOa) |
| --- | --- | --- | --- | --- | --- | --- |
| Ligand | 3385s (br)  3249m (sh)  3099w (sh) | 1624w | 943s | 886s | 789vs | 705vs  669vs (sh) |
| **1** | 3592m (sh)  3432s (br)  3183m (sh) | 1628w (br) | 947s | 872s | 796vs (br)  745vs (br) | 641s (br) |
| **2** | 3602 a  3433s (br)  3203m (sh) | 1627w (br) | 939s | 866s | 777vs (br) | 685m (sh) |
| **3** | 3434s (br)  3165m (sh) | 1628w (br) | 932s |  | 810vs  773 a | 671m (br) |
| **4** | 3430s (br)  3195m (sh) | 1627w (br) | 940s | 866s (br) | 820m (sh)  766vs (br) | 691m (sh) |
| **5** | 3594 a  3421s (br)  3181m (sh) | 1636w (br) | 939s | 869s (sh) | 816vs  771m (br) | 721w (sh)  642m (br) |
| **6** | 3394s (br)  3155m (sh) | 1623w (br) | 946s | 864s (sh) | 822vs (br)  797vs (br)  761vs (br) | 667m (sh)  643m (br) |
| **7** | 3427s (br)  3235m (sh)  3050w (sh) | 1617w | 944s | 884s | 759vs (sh) | 725vs |

a masked band, obtained from the first derivative of the FT-IR spectrum

**Fig. I** Powder EPR spectra of the complex **2** recorded in the X-band at two different temperatures.

**Fig. II** Powder EPR spectra of the complex **3** recorded in the X-band and two different temperatures.

**Fig. III** Temperature dependence of the inverse of the linewidth (*B*(p-p))1 of the HF-EPR signal of the complex **3**. The solid line represents the best fit of the data.

**Fig. IV** Powder EPR spectra of the complex **5** recorded in the X-band at two different temperatures.

**Fig. V** (a) Powder EPR spectra of the complex **7** recorded in the X-band at *T* = 293 K and (b) its simulated spectrum with *S* = 3/2.
